# Supplementary material for: Microwave-Assisted Synthesis of Nanoporous Aluminum-Based Coordination Polymers as Catalysts for Selective Sulfoxidation Reaction
Source: PubMed Central journal article supplement (PMC6418783; doi:10.3390/polym9100498), 2017-10-11
Supplement: polymers-09-00498-s001.pdf [file polymers-09-00498-s001.pdf]

## Supporting Information

# Microwave-Assisted Synthesis of Aluminium MOFs as Catalysts for Selective Sulfoxidation Reaction

Madhan Vinu, Wei-Cheng Lin, Duraisamy Senthil Raja, Jeng-Liang Han\* and Chia-Her Lin\*

Department of Chemistry, Chung Yuan Christian University, Chung Li, Taoyuan, Taiwan 32023.

Correspondence: jlhan@cycu.edu.tw (J.-L.H.); chiaher@cycu.edu.tw (C.-H.L.)

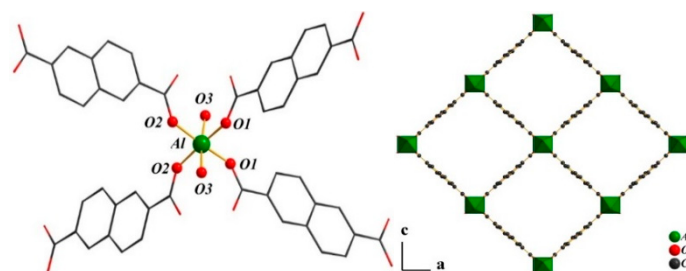

(a)

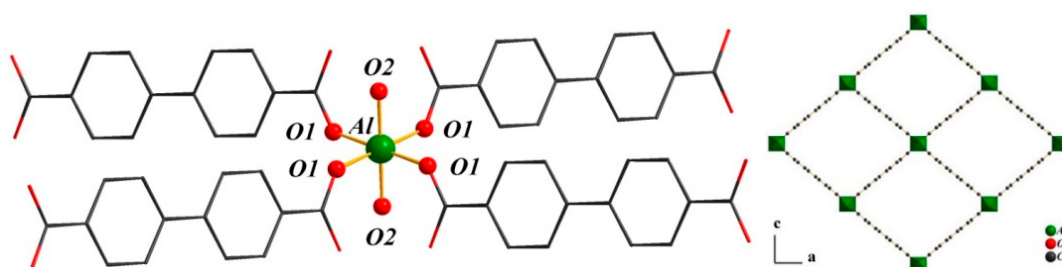

(b)

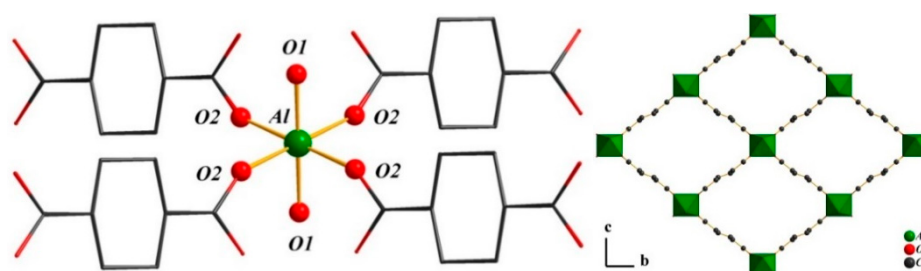

(c)

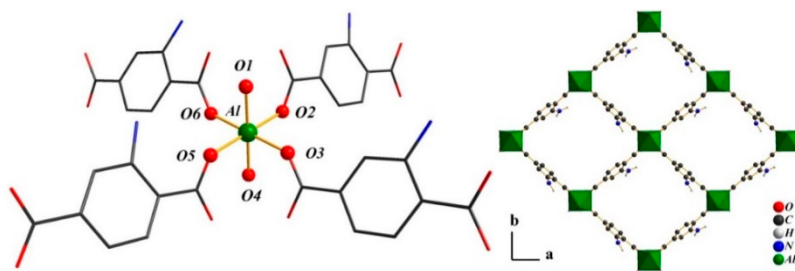

(d)

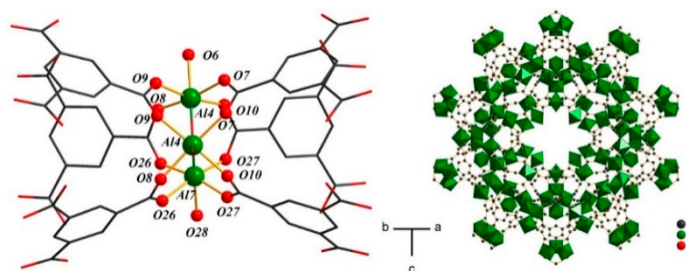

(e)

**Figure S1.** The coordination environments of Al atoms (left) and porous structures (right) of (a) DUT-4(Al), (b) DUT-5(Al), (c) MIL-53(Al), (d) NH<sub>2</sub>-MIL-53(Al) and (e) MIL-100(Al).

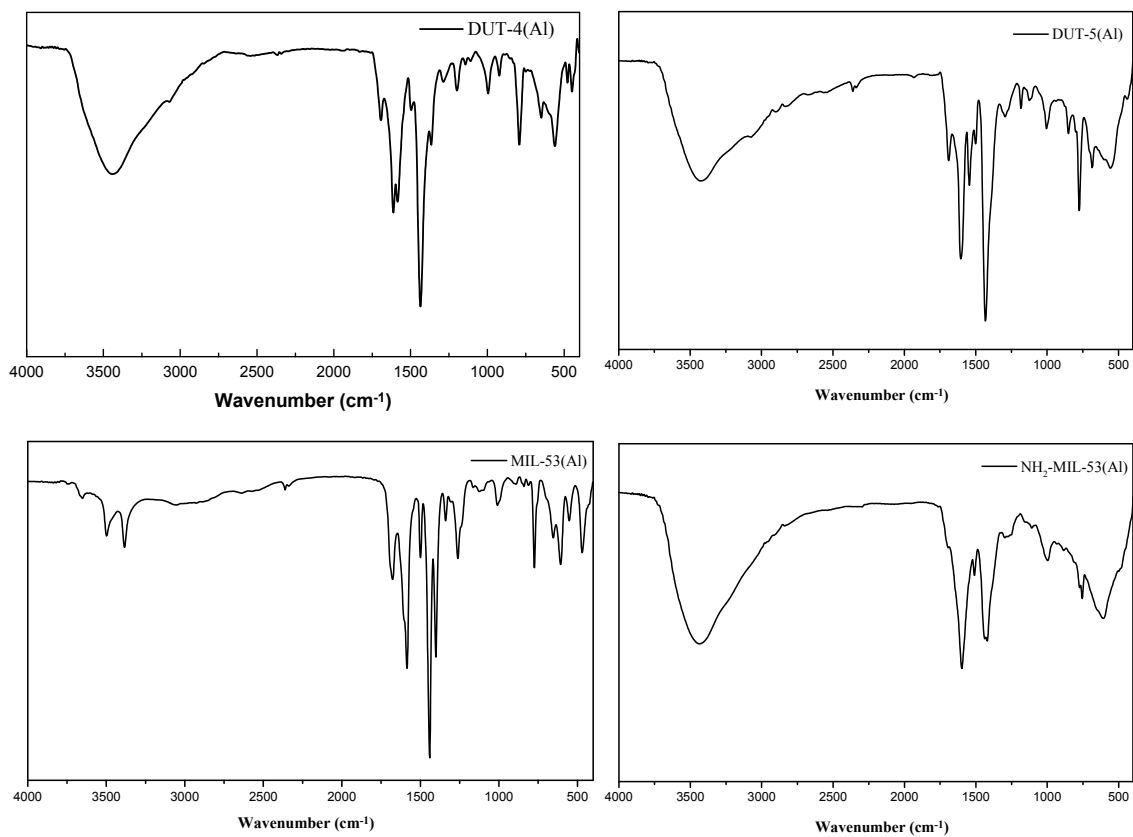

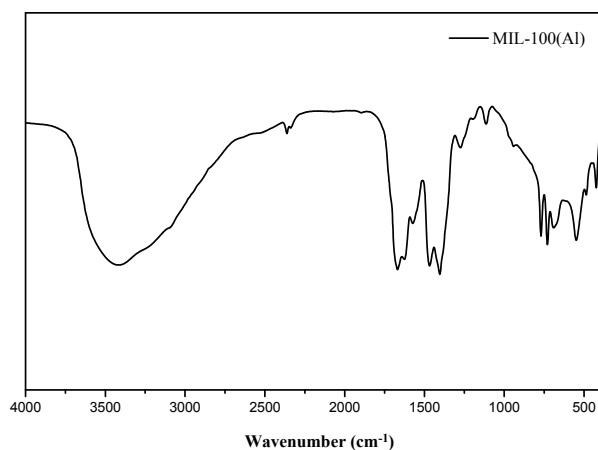

**Figure S2.** The FT-IR spectra of activated samples of DUT-4(Al), DUT-5(Al), MIL-53(Al), NH<sub>2</sub>-MIL-53(Al), and MIL-100(Al).

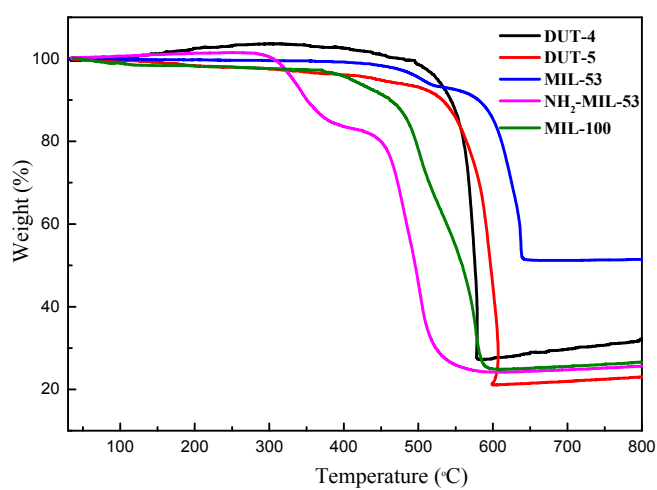

**Figure S3.** The thermogravimetric analysis curve of activated samples of DUT-4(Al), DUT-5(Al), MIL-53(Al) NH<sub>2</sub>-MIL-53(Al) and MIL-100(Al).

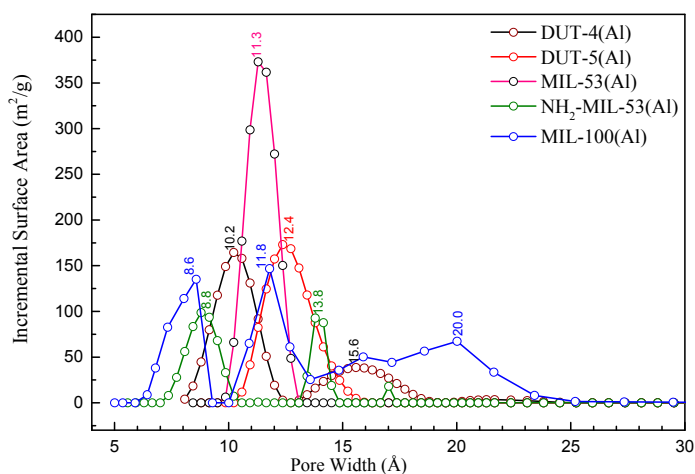

**Figure S4.** The DFT pore size distribution for DUT-4(Al), DUT-5(Al), MIL-53(Al), NH<sub>2</sub>-MIL-53(Al), and MIL-100(Al).

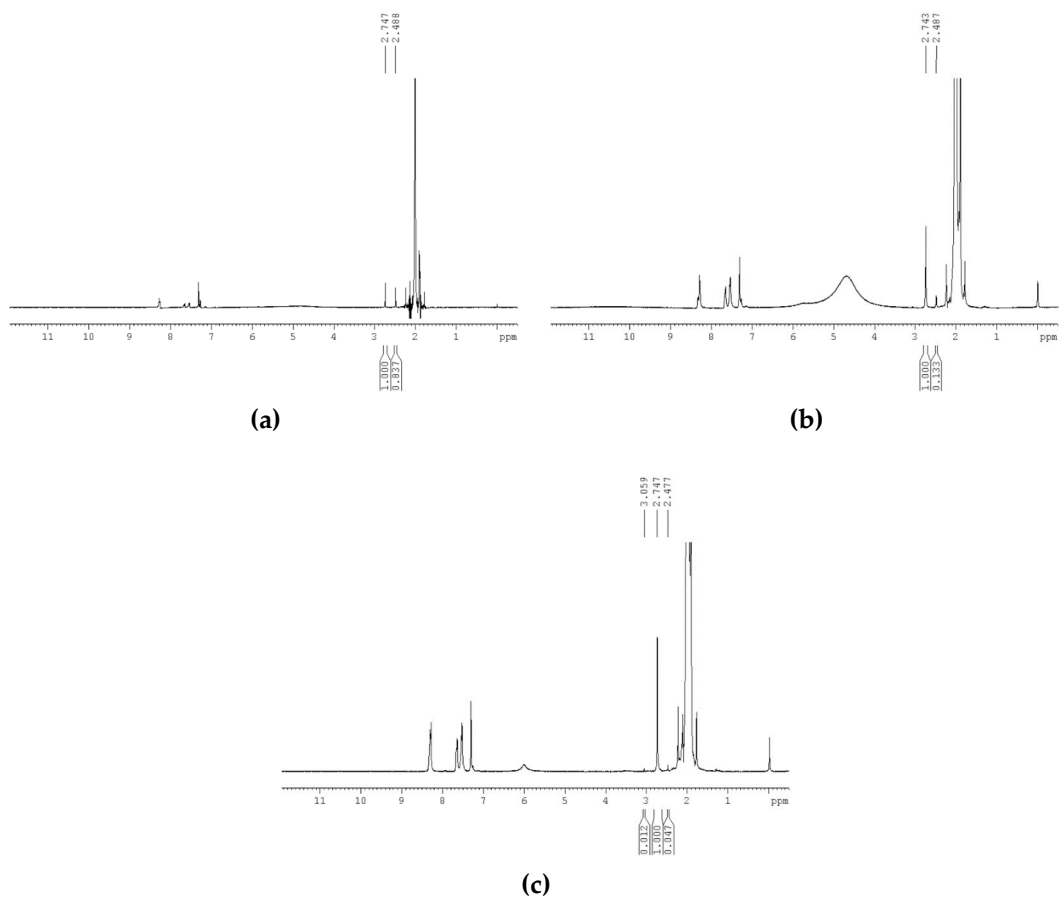

**Figure S5.**  $^1\text{H}$  NMR spectrum of catalytic result for DUT-4(Al) at room temperature for 24 (a), 48 (b) and 72 h (c).

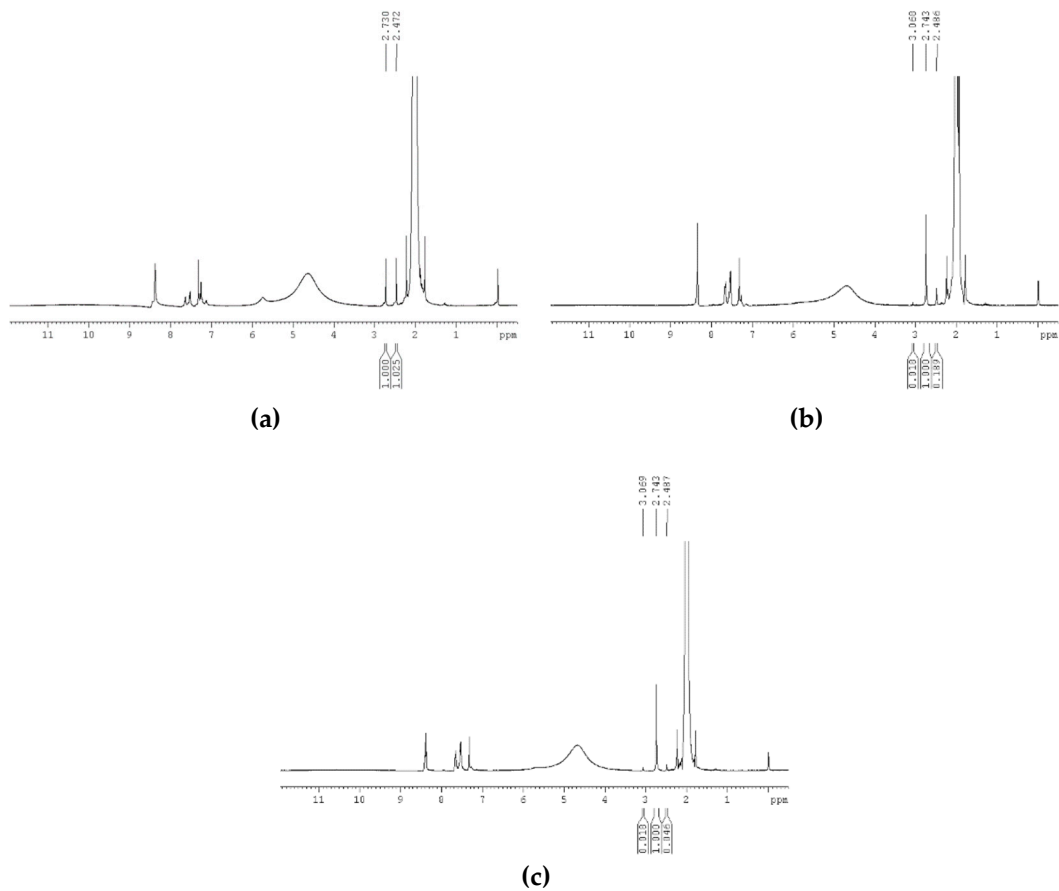

**Figure S6.**  $^1\text{H}$ -NMR spectrum of catalytic result for DUT-5(Al) at room temperature for 24 (a), 48 (b) and 72 h (c).

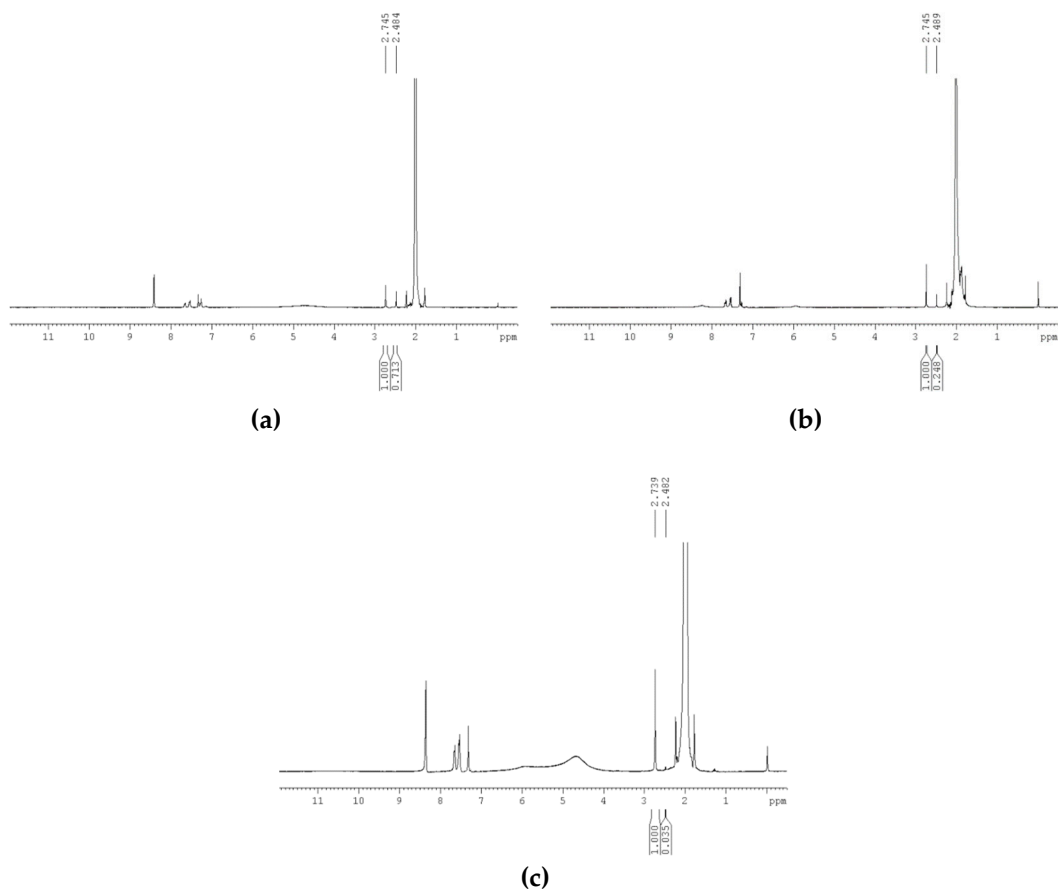

**Figure S7.**  $^1\text{H}$  NMR spectrum of catalytic result for MIL-53(Al) at room temperature for 24 (a), 48 (b) and 72 h (c).

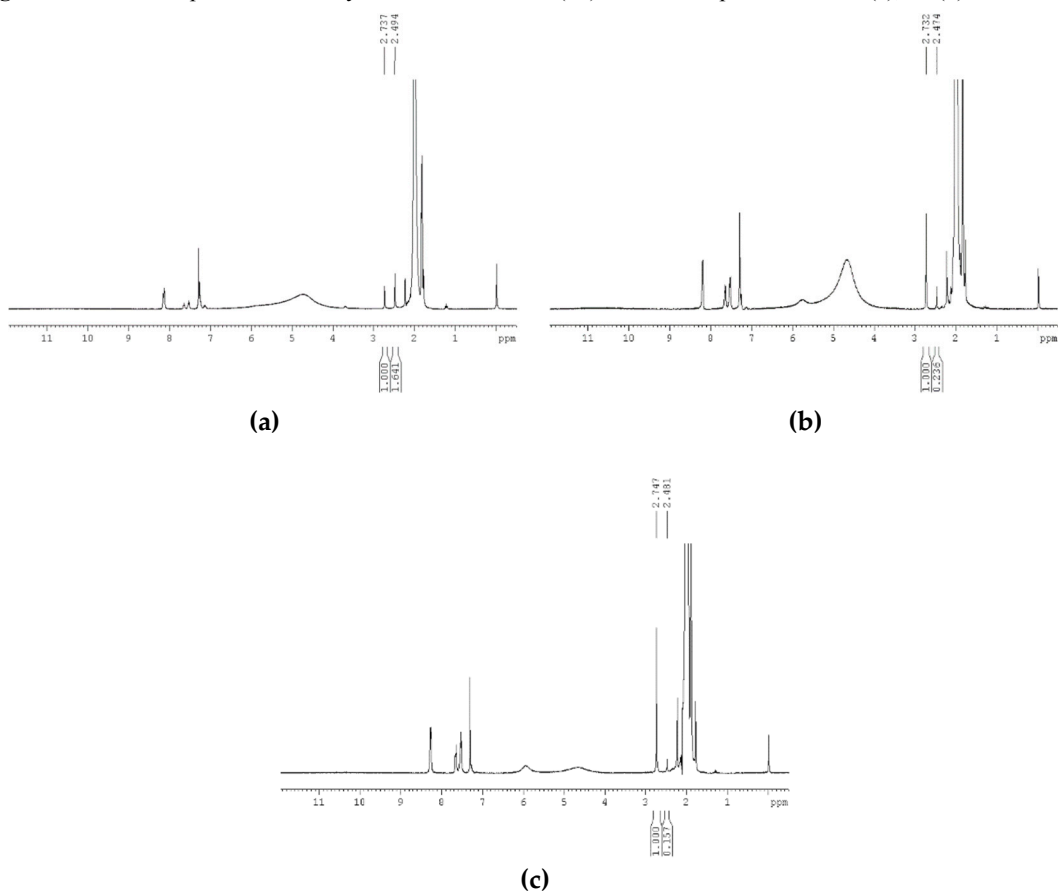

**Figure S8.**  $^1\text{H}$  NMR spectrum of catalytic result for  $\text{NH}_2\text{-MIL-53(Al)}$  at room temperature for 24 (a), 48 (b) and 72 h (c).

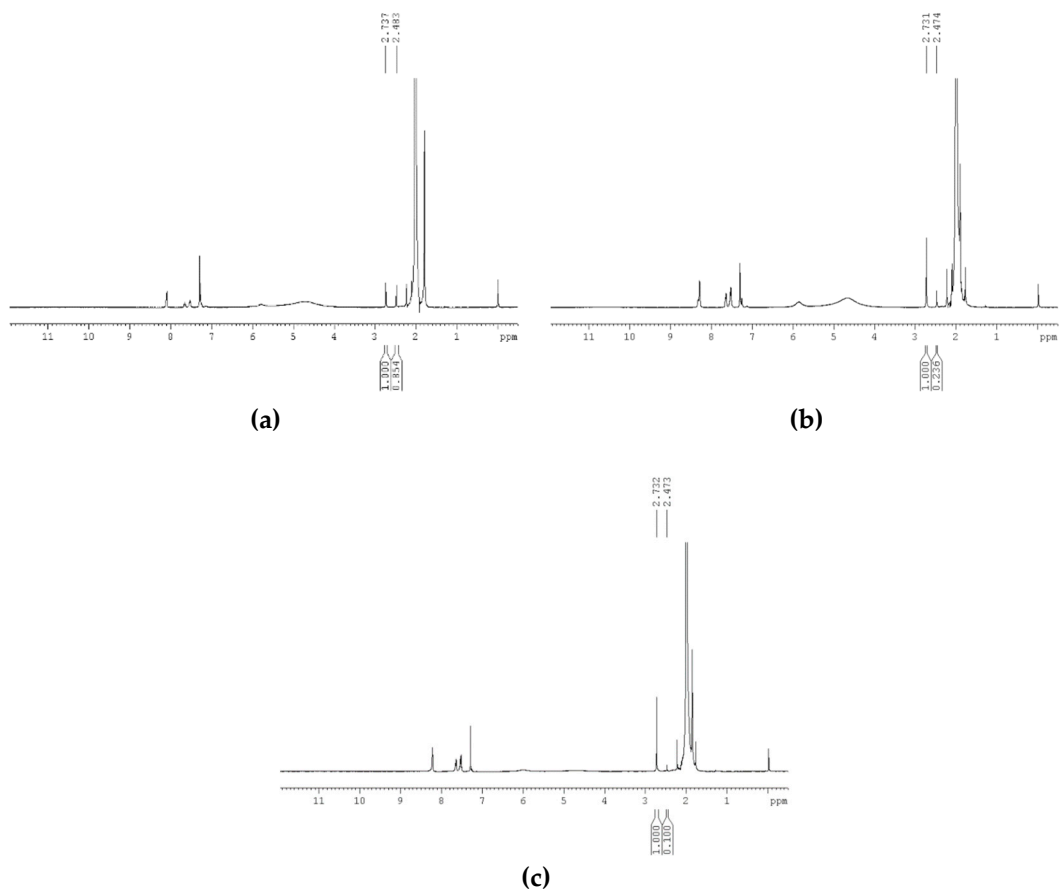

**Figure S9.**  $^1\text{H-NMR}$  spectrum of catalytic result for MIL-100(Al) at room temperature for 24 (a), 48 (b) and 72 h (c).

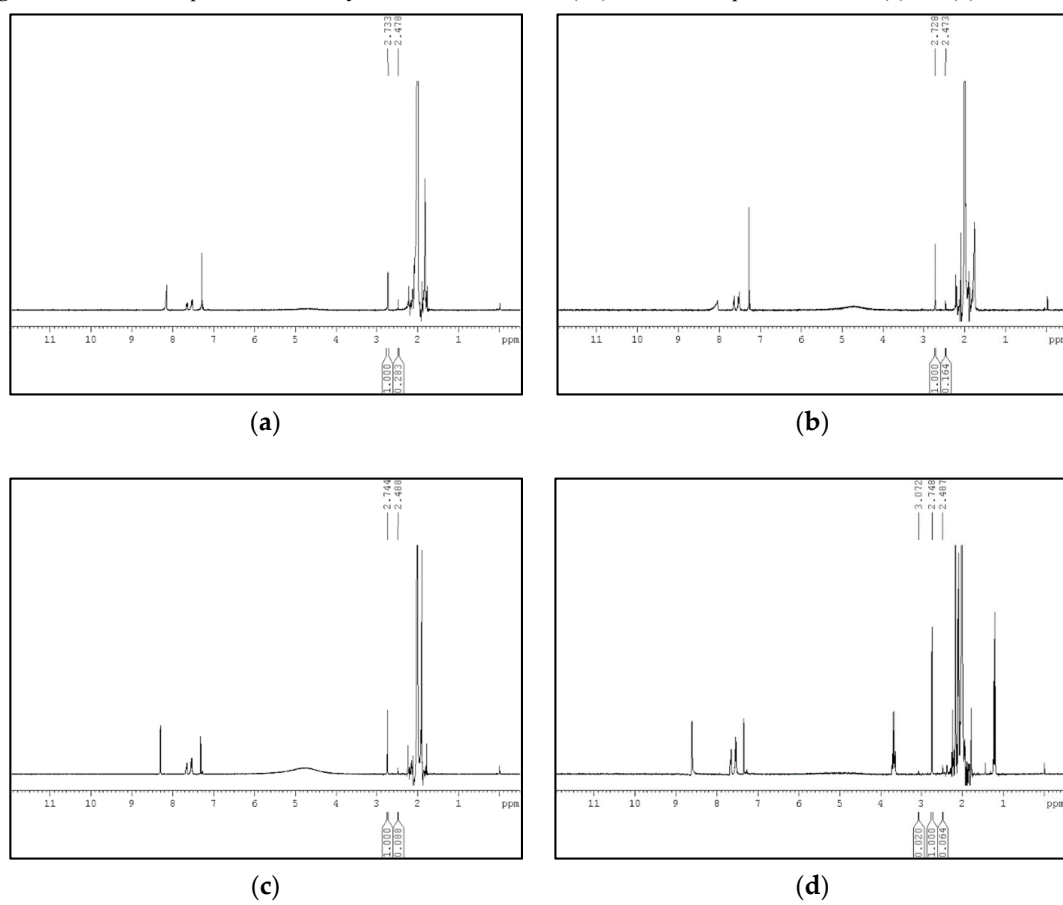

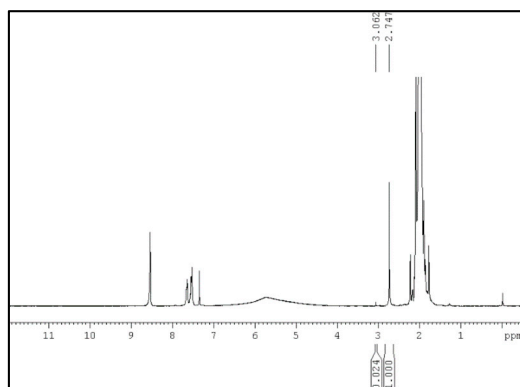

(e)

**Figure S10.**  $^1\text{H}$  NMR spectrum of catalytic result for DUT-4(Al) at 60 °C for 3 (a), 4 (b), 5 (c), 6 (d) and 7 h (e).

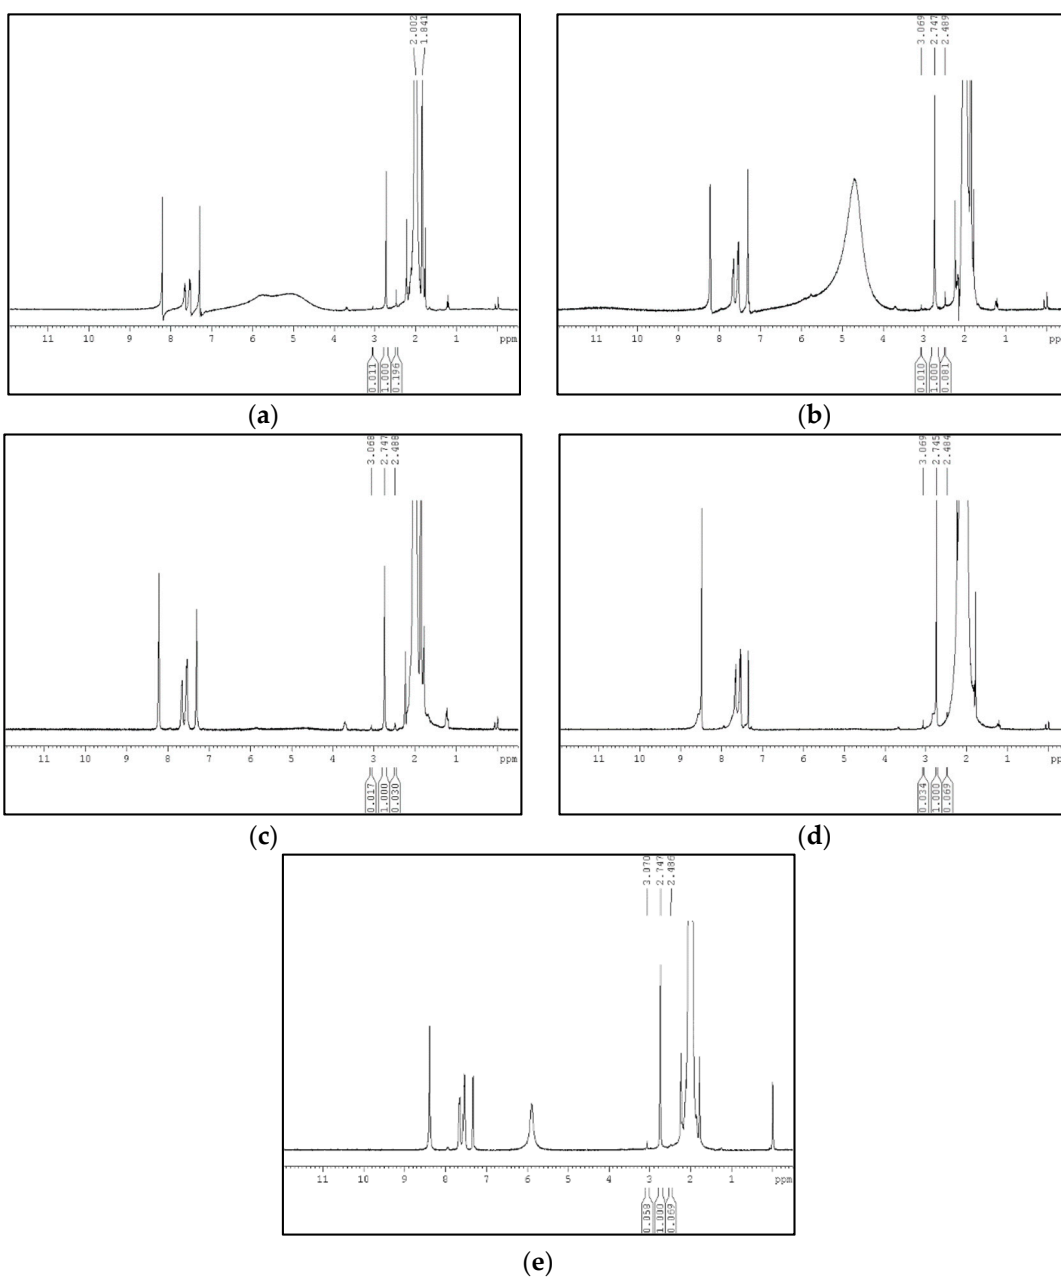

**Figure S11.**  $^1\text{H}$  NMR spectrum of catalytic result for DUT-5(Al) at 60 °C for 3 (a), 4 (b), 5 (c), 6 (d) and 7 h (e).

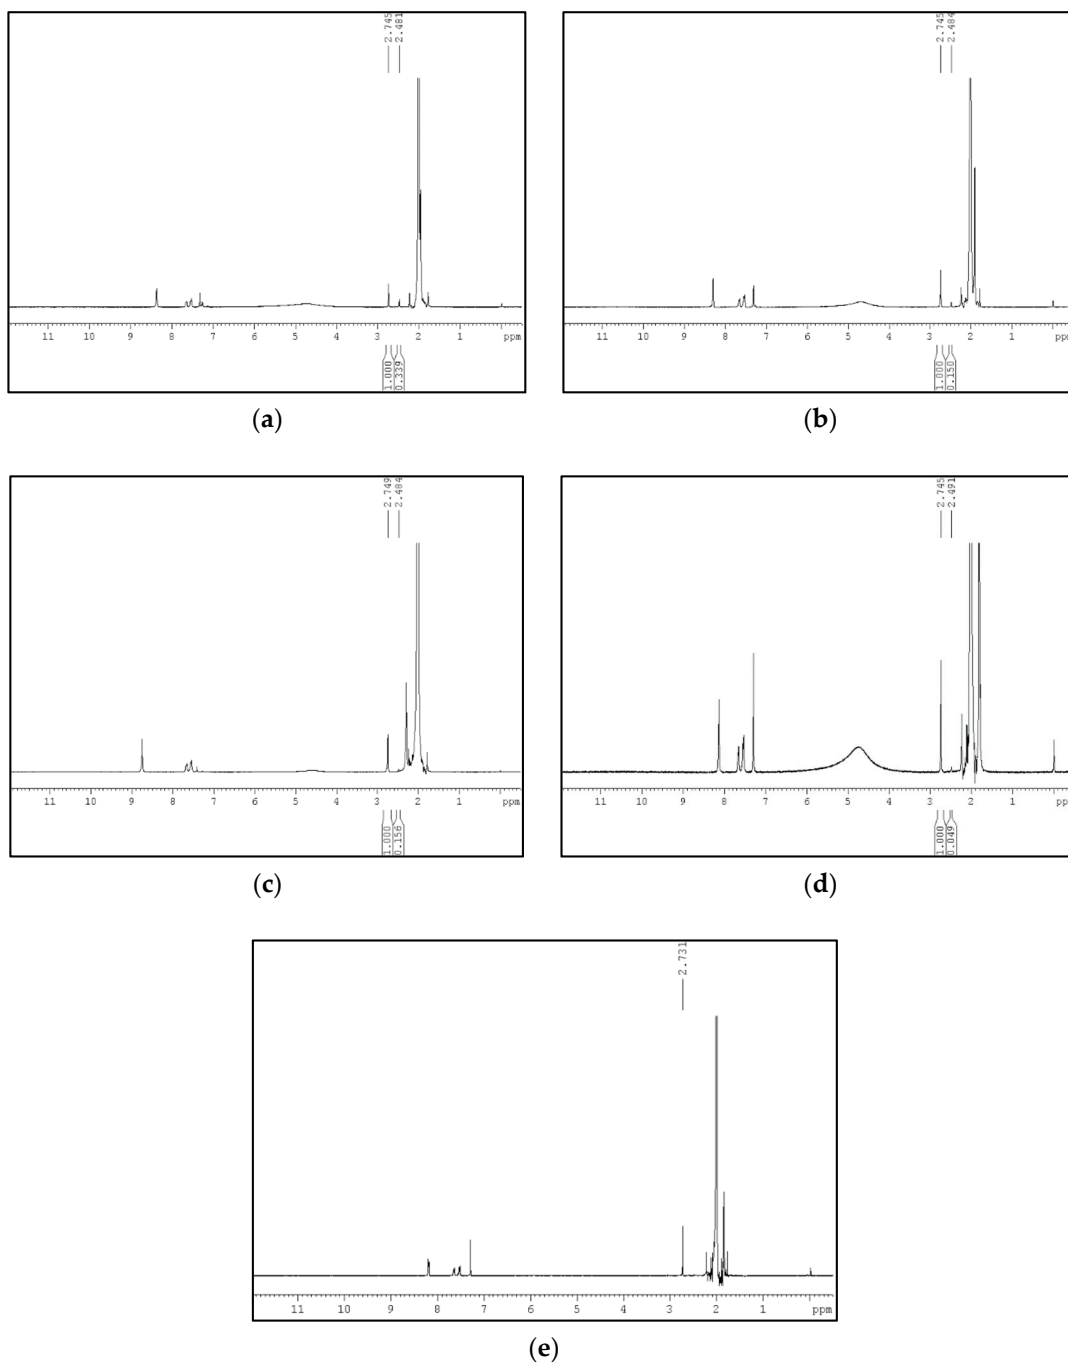

**Figure S12.**  $^1\text{H}$  NMR spectrum of catalytic result for MIL-53(Al) at 60 °C for 3 (a), 4 (b), 5 (c), 6 (d) and 7 h (e).

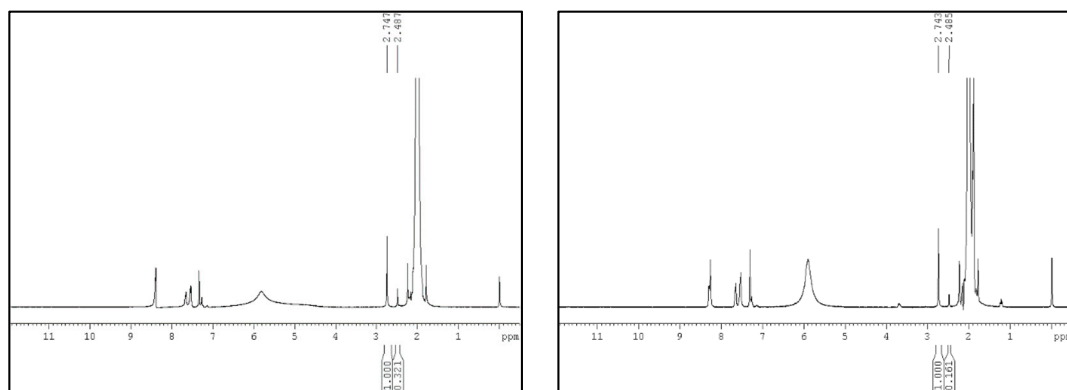



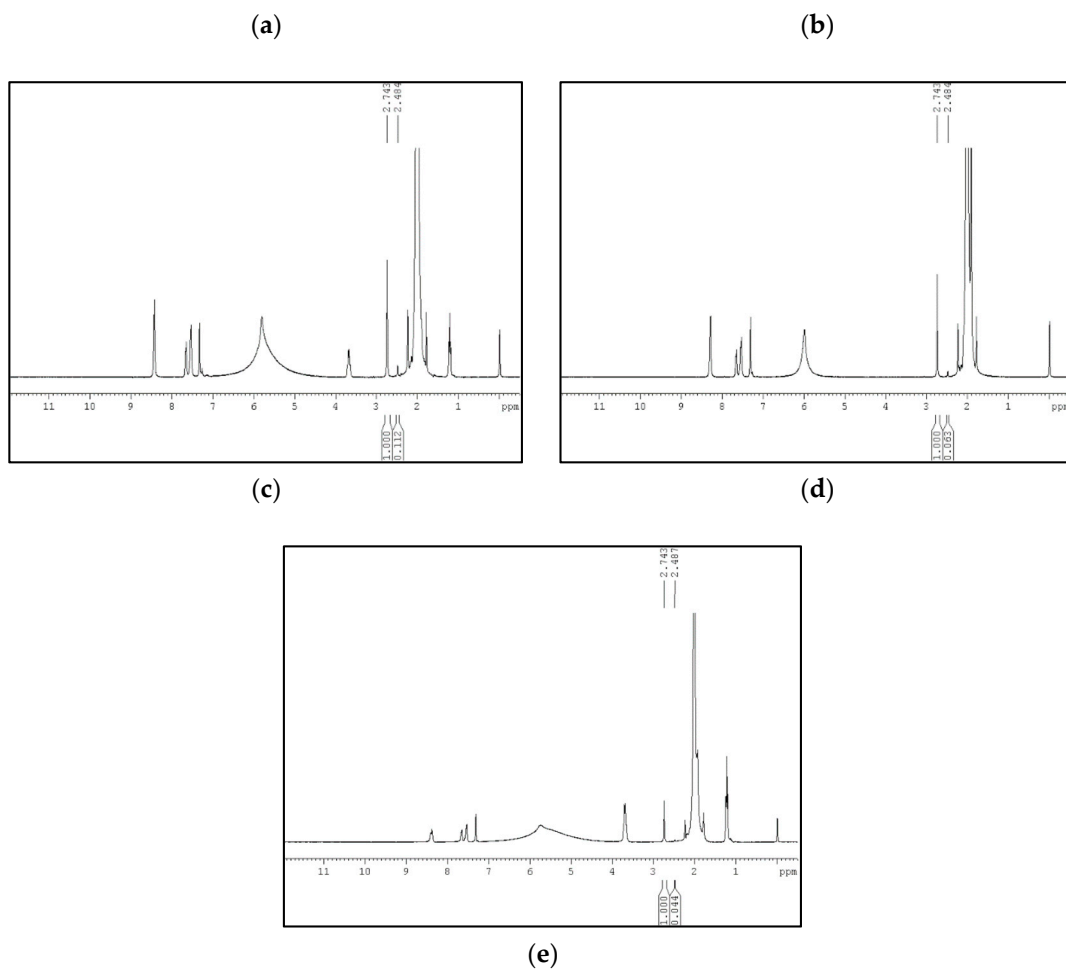

**Figure S13.**  $^1\text{H}$  NMR spectrum of catalytic result for  $\text{NH}_2\text{-MIL-53(Al)}$  at  $60\text{ }^\circ\text{C}$  for 3 (a), 4 (b), 5 (c), 6 (d) and 7 h (e).

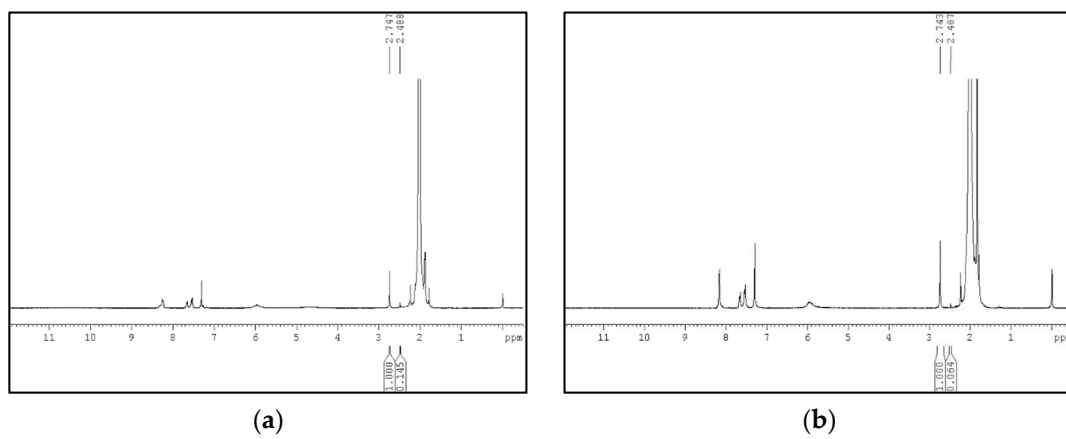

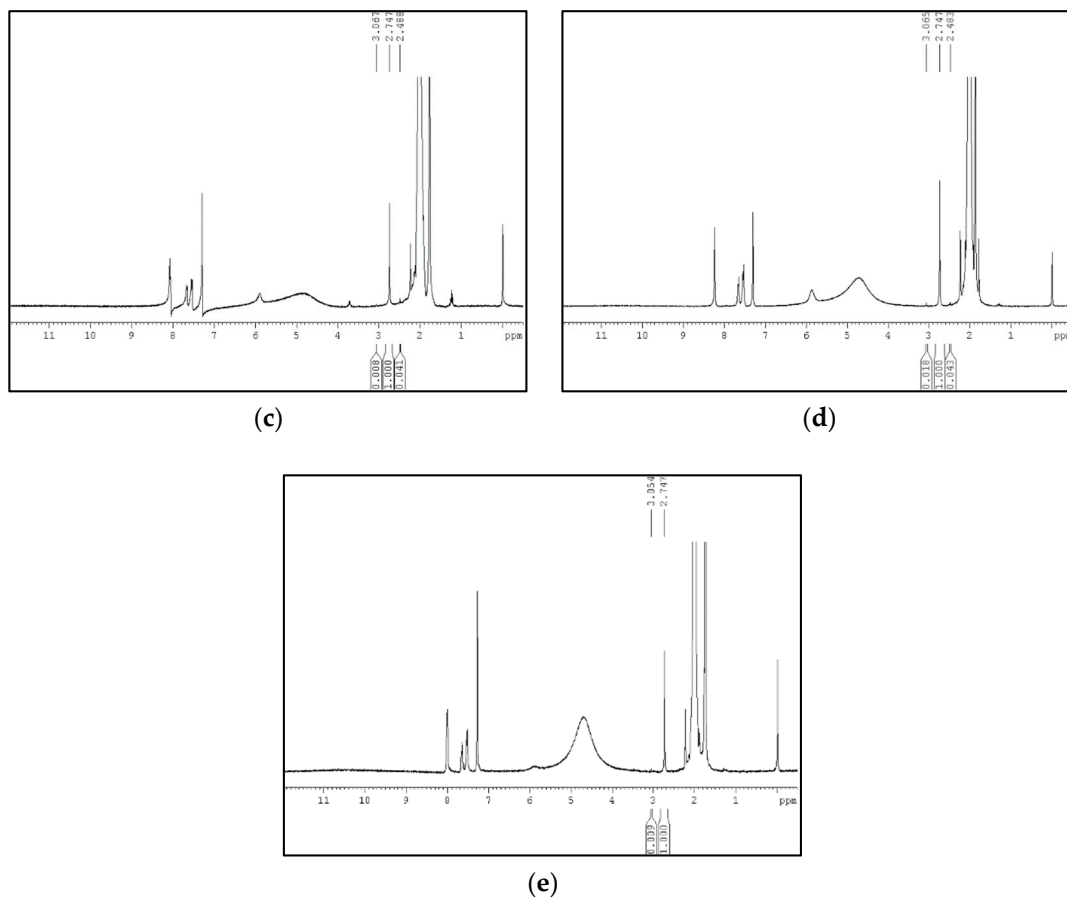

**Figure S14.**  $^1\text{H}$  NMR spectrum of catalytic result for MIL-100(Al) at 60 °C for 3 (a), 4 (b), 5 (c), 6 (d) and 7 h (e).

(a)

(b)

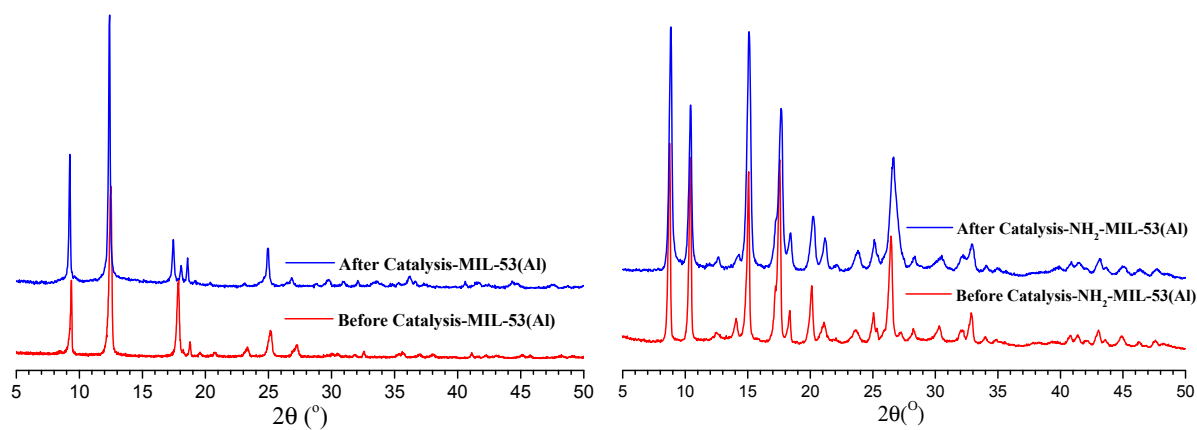

(c)

(d)

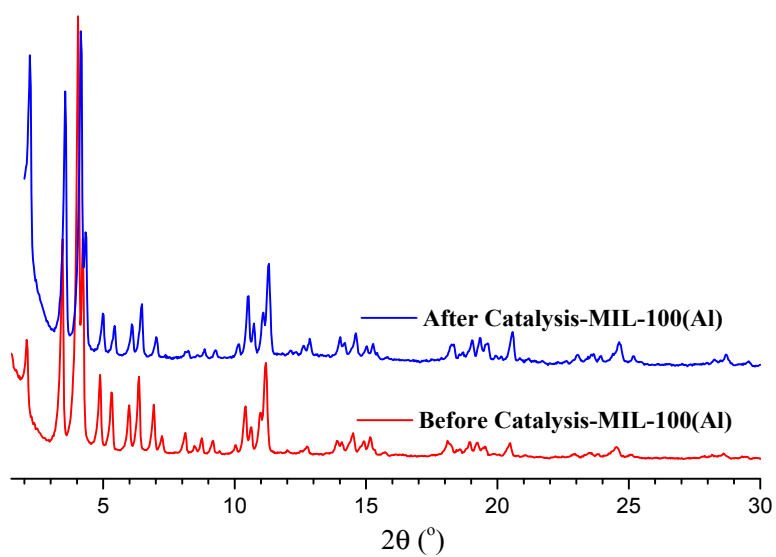

(e)

**Figure S15.** The comparison of PXRD patterns of (a) DUT-4(Al), (b) DUT-5(Al), (c) MIL-53(Al), (d) NH<sub>2</sub>-MIL-53(Al), and (e) MIL-100(Al) before and after catalysis.
